# Supplementary material for: An improved differential evolution algorithm for multi-modal multi-objective optimization
Source: PeerJ journal article supplement (doi:10.7717/peerj-cs.1839), 2024-03-14
Supplement: FigS1.pdf [file FigS1.pdf]

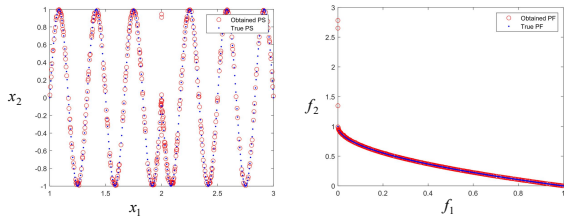

MMF1

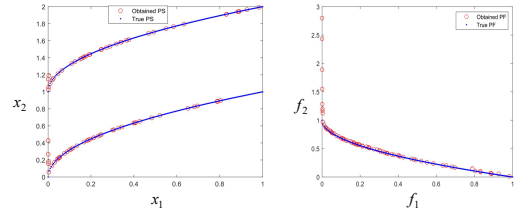

MMF2

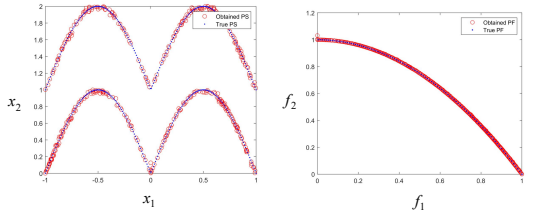

MMF4

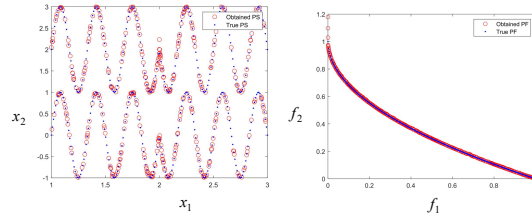

MMF5

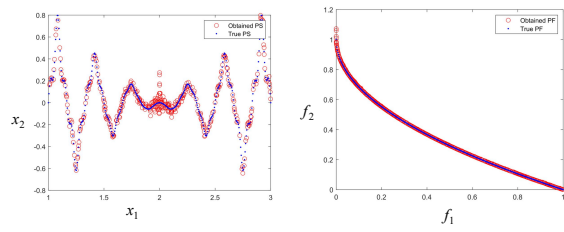

MMF7

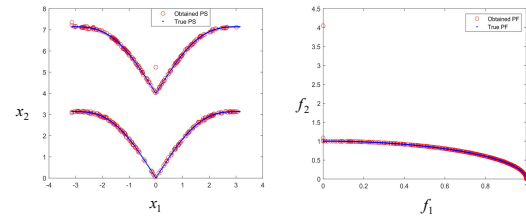

MMF8

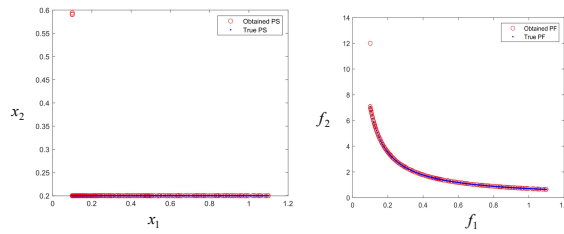

MMF10

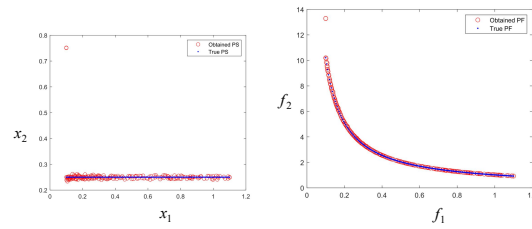

MMF11

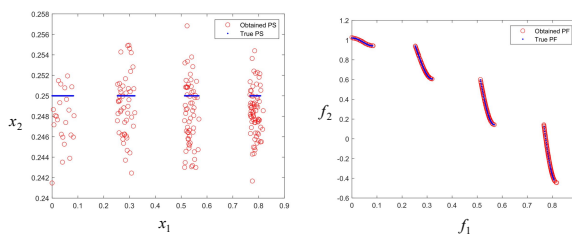

MMF12

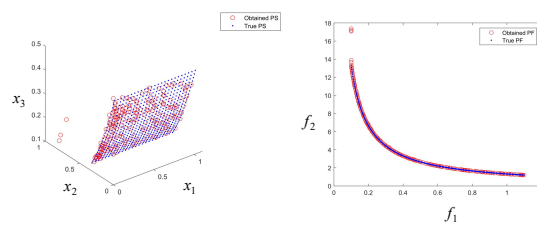

MMF13

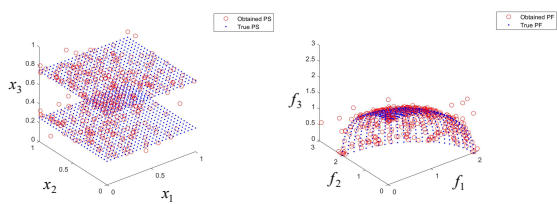

MMF14

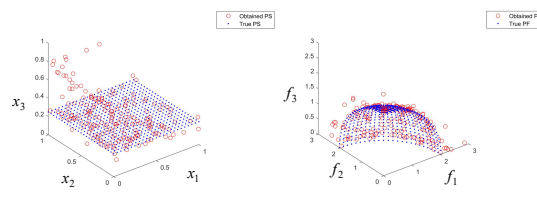

MMF15

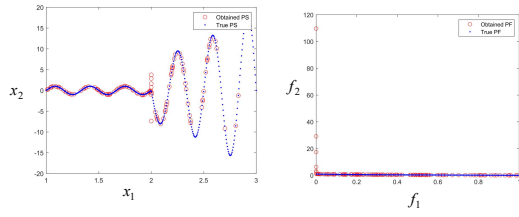

MMF1\_e

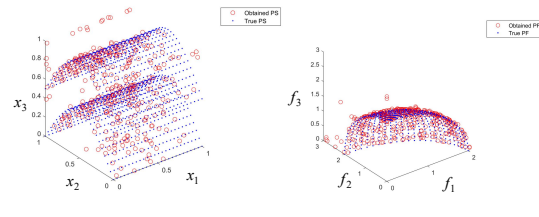

MMF14\_a

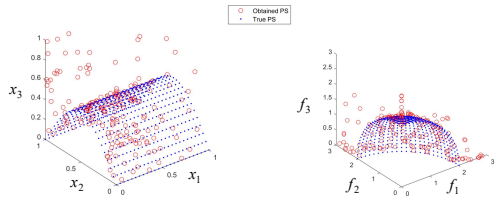

MMF15\_a

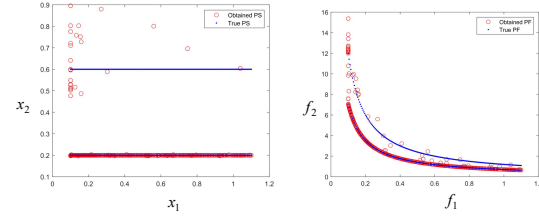

MMF10\_l

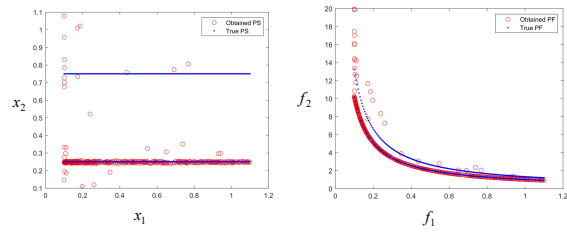

MMF11\_l

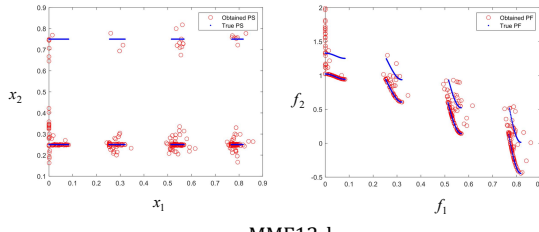

MMF12\_l

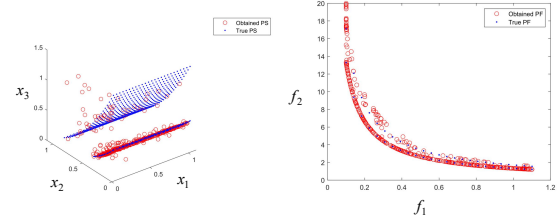

MMF13\_l

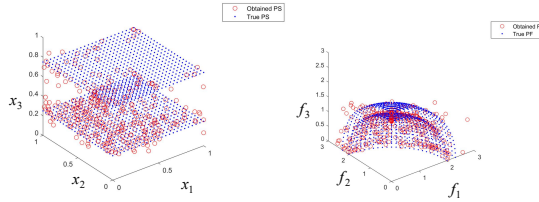

MMF15\_l

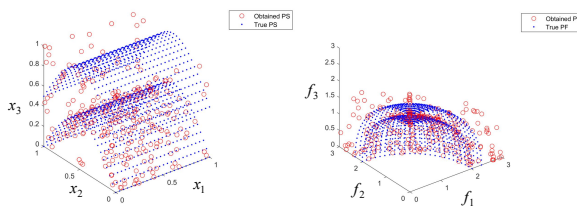

MMF15\_a\_l

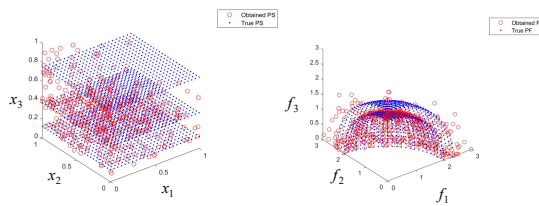

MMF16\_l1

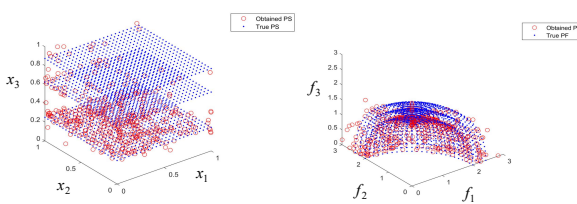

MMF16\_l2

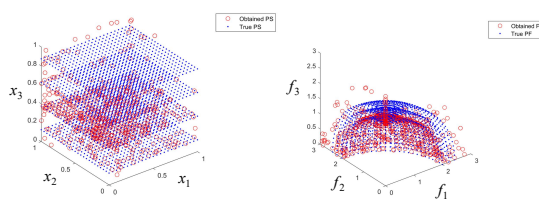

MMF16\_l3
