# Supplementary material for: An improved differential evolution algorithm for multi-modal multi-objective optimization
Source: PeerJ journal article supplement (doi:10.7717/peerj-cs.1839), 2024-03-14

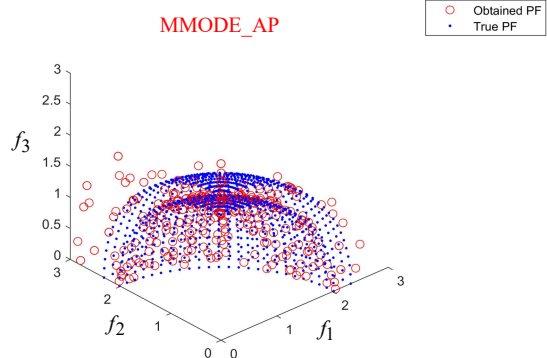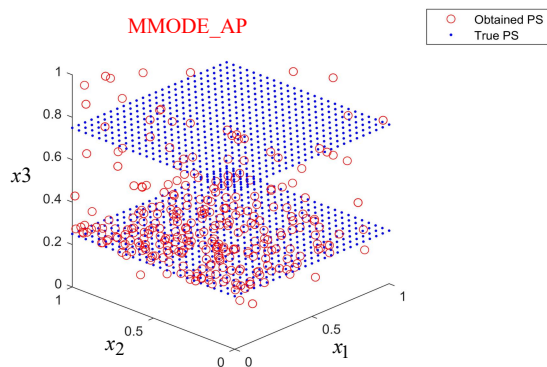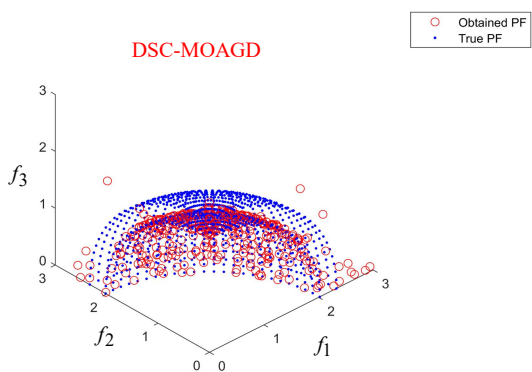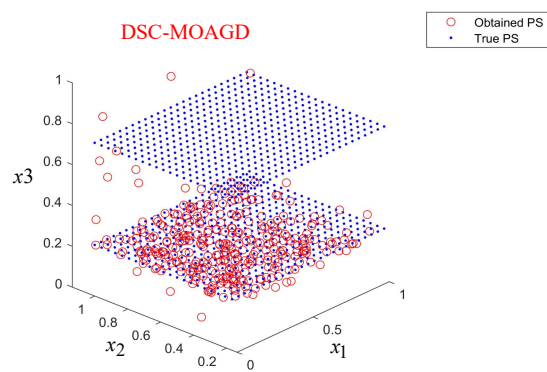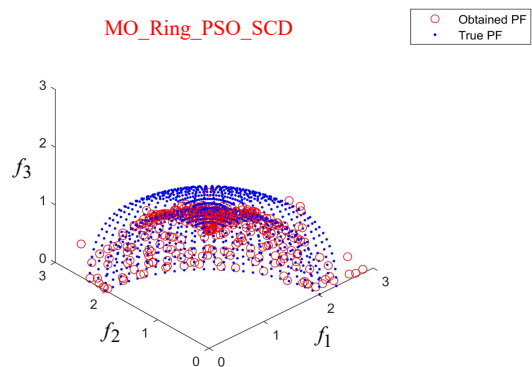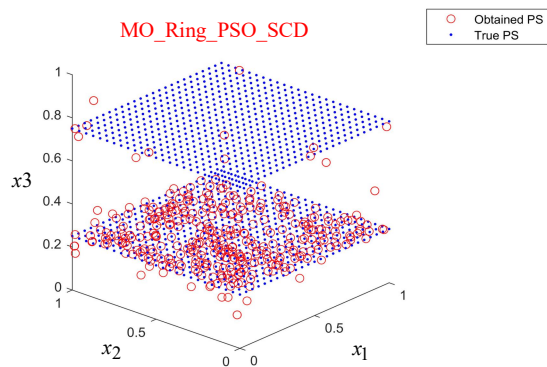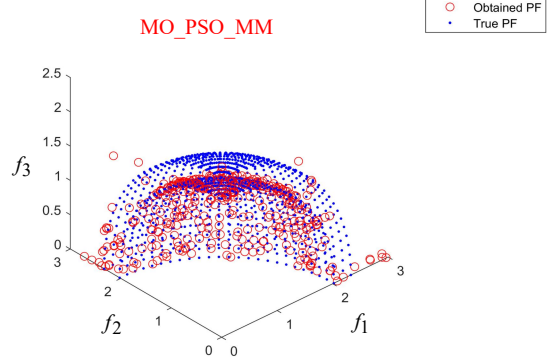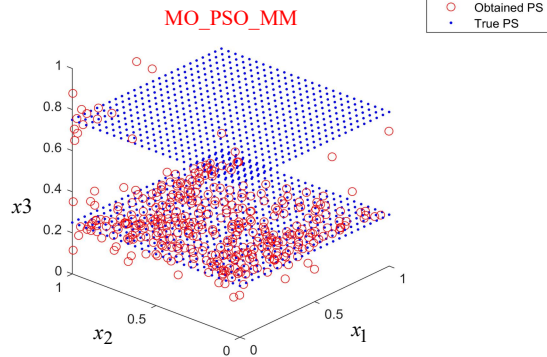

Supplement: FigS2.pdf [file FigS2.pdf]
